# Supplementary material
Source: ML conference proceedings conference paper supplement (https://openreview.net/forum?id=9udVudwIw8)
Supplement: supplementary_material [file attachment]

# Supplementary Materials of “Regularized Contrastive Partial Multi-view Outlier Detection”

Anonymous Authors

## 1 DETAILED PROOF OF PROPOSITION 3.1

PROOF. Note that the negative samples could be chosen from both inliers and outliers, the loss values of class-related outliers can be formulated as:

$$\begin{aligned}\mathcal{L}_{con}^o &= -\frac{1}{2} \sum_{m=1}^2 \mathbb{E}_{z_o \in \mathcal{Z}_o} \log \left( \frac{f(z_o^{(m)}, z_o^{(m')})}{S_{in} + S_{out}} \right), \\ S_{in} &= \sum_{z_{in} \in \mathcal{Z}_{in}} \sum_{v=1}^2 f(z_o^{(m)}, z_{in}^{(v)}), \\ S_{out} &= \sum_{z_{out} \in \mathcal{Z}_o} \sum_{v=1}^2 f(z_o^{(m)}, z_{out}^{(v)}),\end{aligned}\quad (1)$$

where  $\mathcal{Z}_o, \mathcal{Z}_{in}$  denote the latent representation sets of class-related outlier and inlier instances, respectively;  $f(x, y)$  is defined as  $e^{s(x, y)} / \tau_F$  in practice. According to [1], the optimal  $f(x, y)$  satisfies:

$$f(x, y) = \frac{P(y|x)}{P(y)}.\quad (2)$$

Then, we have:

$$\begin{aligned}S_{in} &= \sum_{v=1}^2 \sum_{z_{in} \in \mathcal{Z}_{in}} \frac{P(z_{in}^{(v)} | z_o^{(m)})}{P(z_{in}^{(v)})} \\ &\approx \sum_{v=1}^2 |\mathcal{Z}_{in}| \cdot \mathbb{E}_{z_{in} \in \mathcal{Z}_{in}} \frac{P(z_{in}^{(v)} | z_o^{(m)})}{P(z_{in}^{(v)})} \\ &= 2|\mathcal{Z}_{in}|,\end{aligned}\quad (3)$$

$$\begin{aligned}S_{out} &= f(z_o^{(m)}, z_o^{(m')}) + f(z_o^{(m)}, z_o^{(m)}) \\ &\quad + \sum_{v=1}^2 \sum_{z_{out} \in \mathcal{Z}_o / \{z_o\}} \frac{P(z_{out}^{(v)} | z_o^{(m)})}{P(z_{out}^{(v)})} \\ &\approx f(z_o^{(m)}, z_o^{(m')}) + 2|\mathcal{Z}_o| - 1.\end{aligned}\quad (4)$$

When the size of  $\mathcal{Z}_o$  and  $\mathcal{Z}_{in}$  is sufficiently large, the approximation error approaches zero. Thus,

$$\begin{aligned}\mathcal{L}_{con}^o &= \frac{1}{2} \sum_{m=1}^2 \mathbb{E}_{z_o \in \mathcal{Z}_o} \log \left( \frac{S_{in} + S_{out}}{f(z_o^{(m)}, z_o^{(m')})} \right) \\ &= \frac{1}{2} \sum_{m=1}^2 \mathbb{E}_{z_o \in \mathcal{Z}_o} \log \left( 1 + \frac{P(z_o^{(m')})}{P(z_o^{(m')} | z_o^{(m)})} (2|\mathcal{Z}_{in}| + 2|\mathcal{Z}_o| - 1) \right) \\ &= \frac{1}{2} \sum_{m=1}^2 \mathbb{E}_{z_o \in \mathcal{Z}_o} \log \left( 1 + \frac{P(z_o^{(m')})}{P(z_o^{(m')} | z_o^{(m)})} (2N - 1) \right) \\ &\geq \frac{1}{2} \sum_{m=1}^2 \mathbb{E}_{z_o \in \mathcal{Z}_o} \log \left( \frac{P(z_o^{(m')})}{P(z_o^{(m')} | z_o^{(m)})} \cdot 2N \right) \\ &= -I(z_o^{(1)}, z_o^{(2)}) + \log 2N,\end{aligned}\quad (5)$$

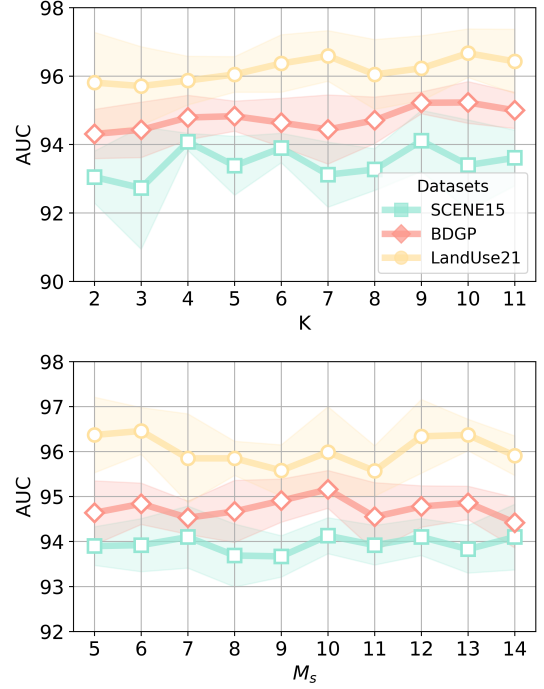

Figure 1: Sensitivity analysis on  $K$  and  $M_s$ .

where the last line uses the fact  $I(z_o^{(1)}, z_o^{(2)}) = I(z_o^{(2)}, z_o^{(1)})$ .

According to the assumption made in the main paper:

$$I(x_o^{(1)}, x_o^{(2)}) \leq \varepsilon.\quad (6)$$

Meanwhile, by the data processing inequality, we have:

$$I(z_o^{(1)}, z_o^{(2)}) \leq I(x_o^{(1)}, x_o^{(2)}) \leq \varepsilon.\quad (7)$$

Combining the above results, we can obtain:

$$\mathcal{L}_{con}^o \geq \log(2N) - I(z_o^{(1)}, z_o^{(2)}) \geq \log(2N) - \varepsilon.\quad (8)$$

□

## 2 ADDITIONAL SENSITIVITY ANALYSIS

There are some other less important hyperparameters in the proposed framework, *e.g.*, the number of neighbors  $K$  used in  $K$ -NN and the size of the memory bank  $N_M$ . As the memory bank is updated by adding potential outliers in the current batch and removing the potential outliers in the oldest batch in the memory bank in practice, we analyze  $M_s$ , the number of batches restored in the memory bank, instead. We fix the missing rate as 0.3 and the outlier ratio of all types of outliers as 0.05, and then evaluate RCPMOD with different values of  $K$  and  $M_s$ . As shown in Figure 1, RCPMOD is not very sensitive to these two hyperparameters.

REFERENCES

[1] Aaron van den Oord, Yazhe Li, and Oriol Vinyals. 2019. Representation Learning with Contrastive Predictive Coding. arXiv:1807.03748

175  
176  
177  
178  
179  
180  
181  
182  
183  
184  
185  
186  
187  
188  
189  
190  
191  
192  
193  
194  
195  
196  
197  
198  
199  
200  
201  
202  
203  
204  
205  
206  
207  
208  
209  
210  
211  
212  
213  
214  
215  
216  
217  
218  
219  
220  
221  
222  
223  
224  
225  
226  
227  
228  
229  
230  
231  
232
